# Supplementary material for: Breast Cancer: Mitochondria-Centered Metabolic Alterations in Tumor and Associated Adipose Tissue
Source: MDPI journal article supplement (doi:10.3390/cells13020155), 2024-01-15

## Western blot

**Supplementary Figure 1.** Images of whole blots against PDH, PDK4, CS, ACOX1, ACADM, ACC, FAS, ATGL, COX I, COX II, COX III, COX IV, ATP synthase, PGC-1 $\alpha$ , and  $\beta$ -actin for tumor and adipose tissue. Each blot is representative of three independent trials and shows three representative bands per group (normal-weight women with benign tumors, overweight/obese women with benign tumors, normal-weight women with malignant tumors, and overweight/obese women with malignant tumors). for tumor tissue and adipose tissue. Three bands per group shown here represent three samples obtained by pooling nine samples from each group before loading.

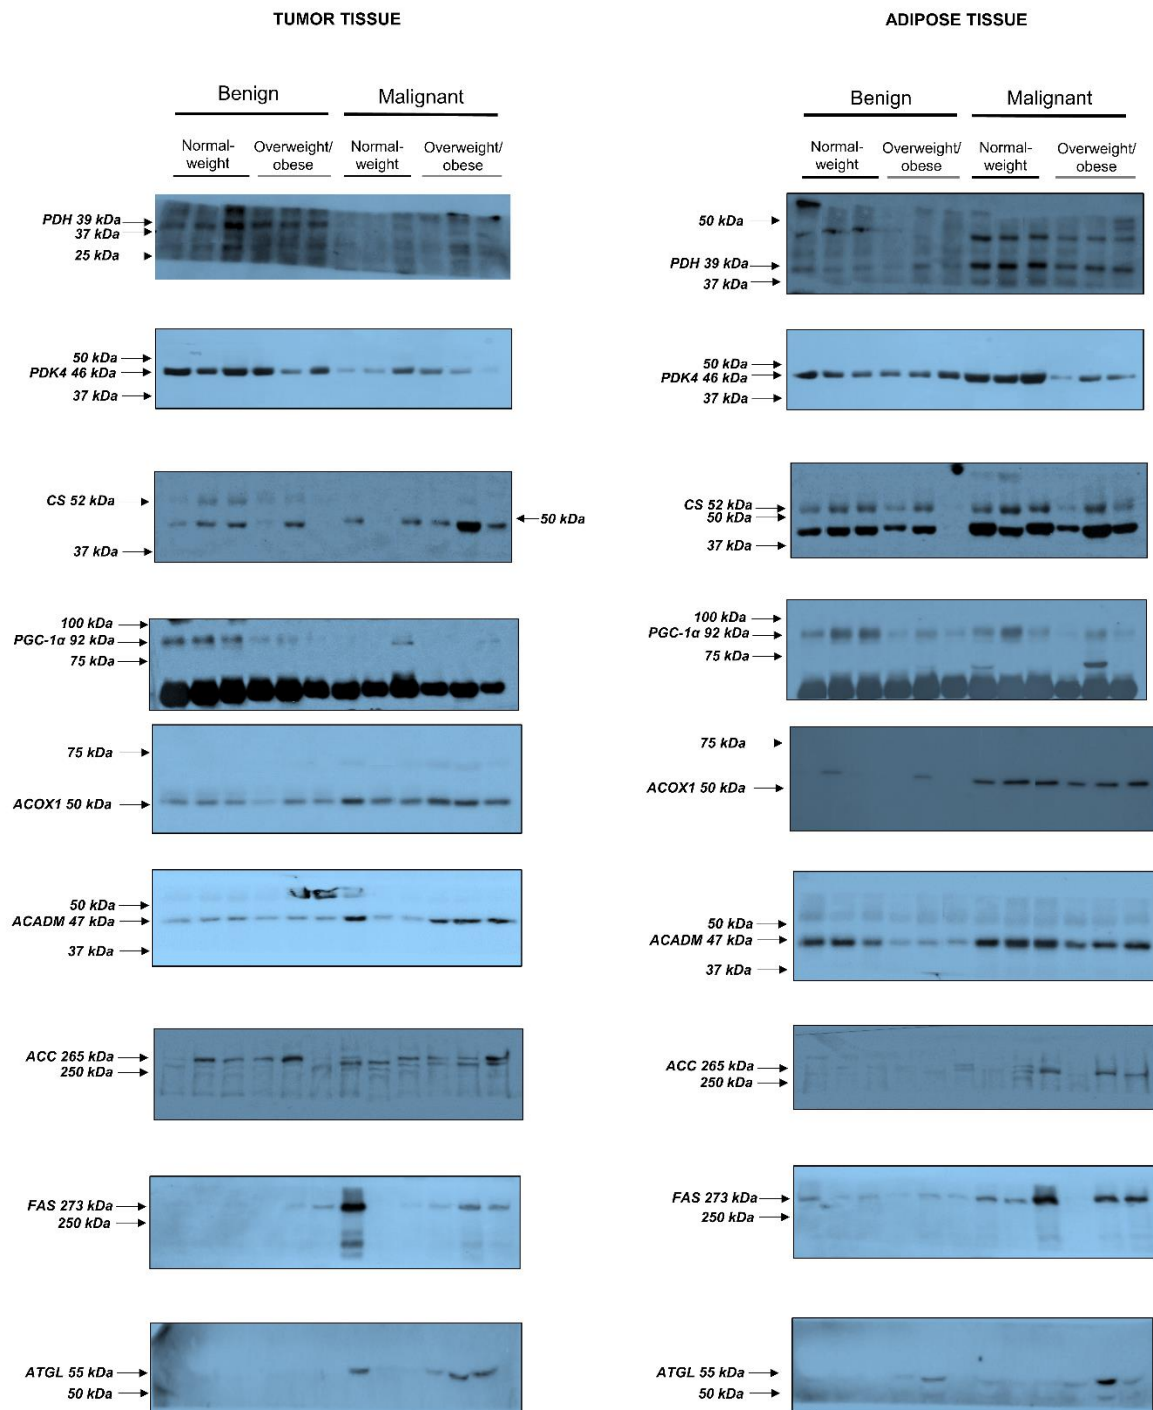

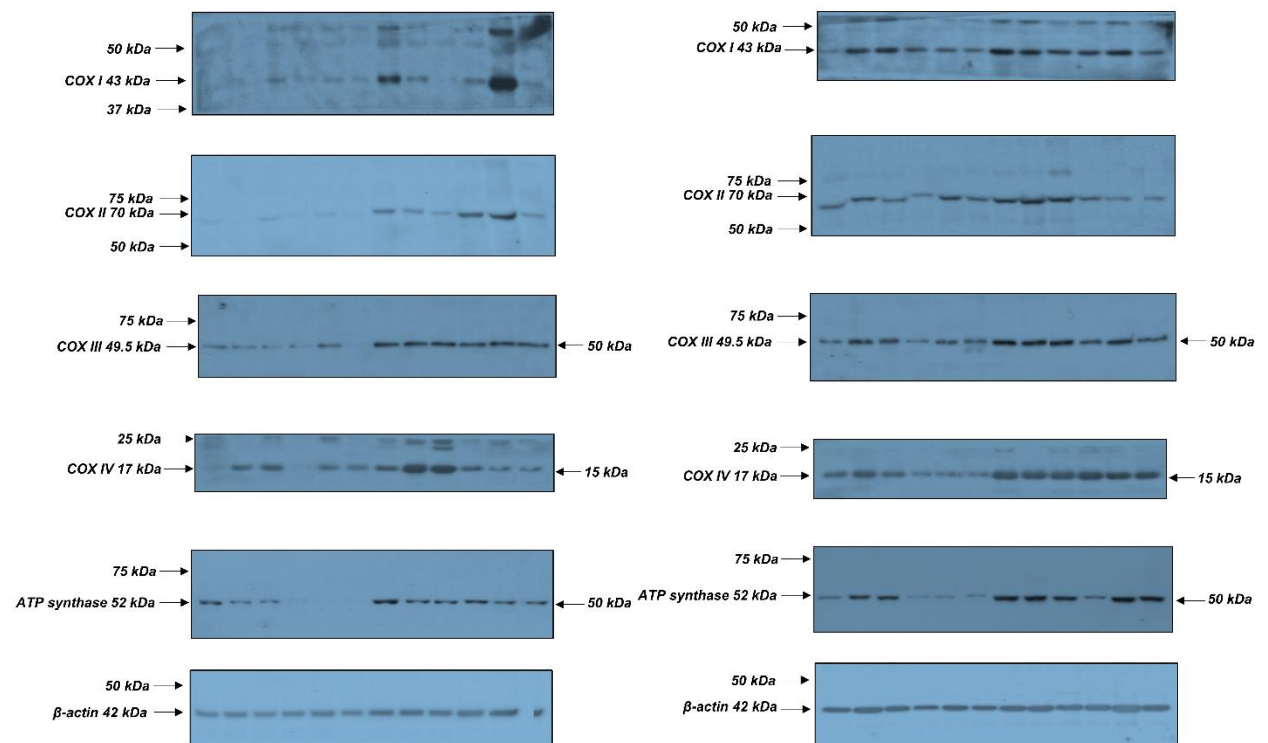

Supplement: s1 [file s1]
